# Supplementary material for: CD44 splice isoform switching determines breast cancer stem cell state
Source: PubMed Central journal article supplement — Genes Dev. 2019 Feb 1;33(3-4):166–79. doi: 10.1101/gad.319889.118 (PMC6362815; doi:10.1101/gad.319889.118), 2019-02-01
Supplement: supp_gad.319889.118_Supplemental_Material.pdf [file supp_gad.319889.118_Supplemental_Material.pdf]

Figure S1

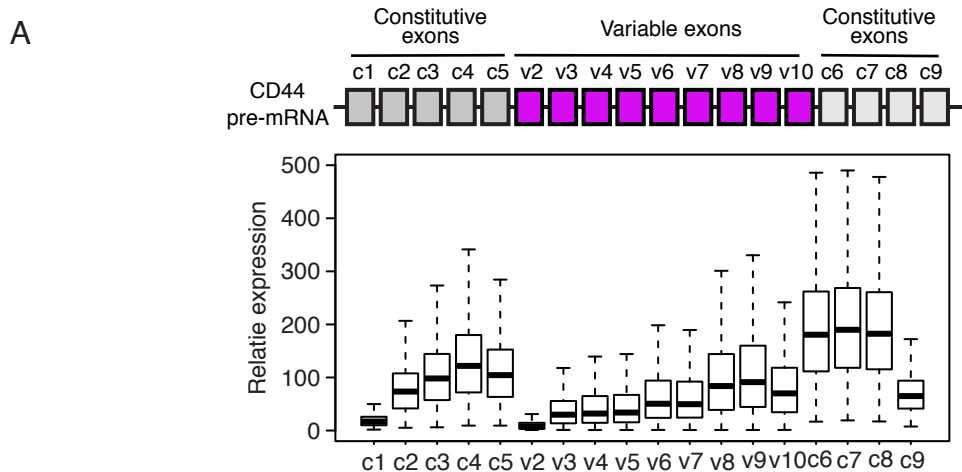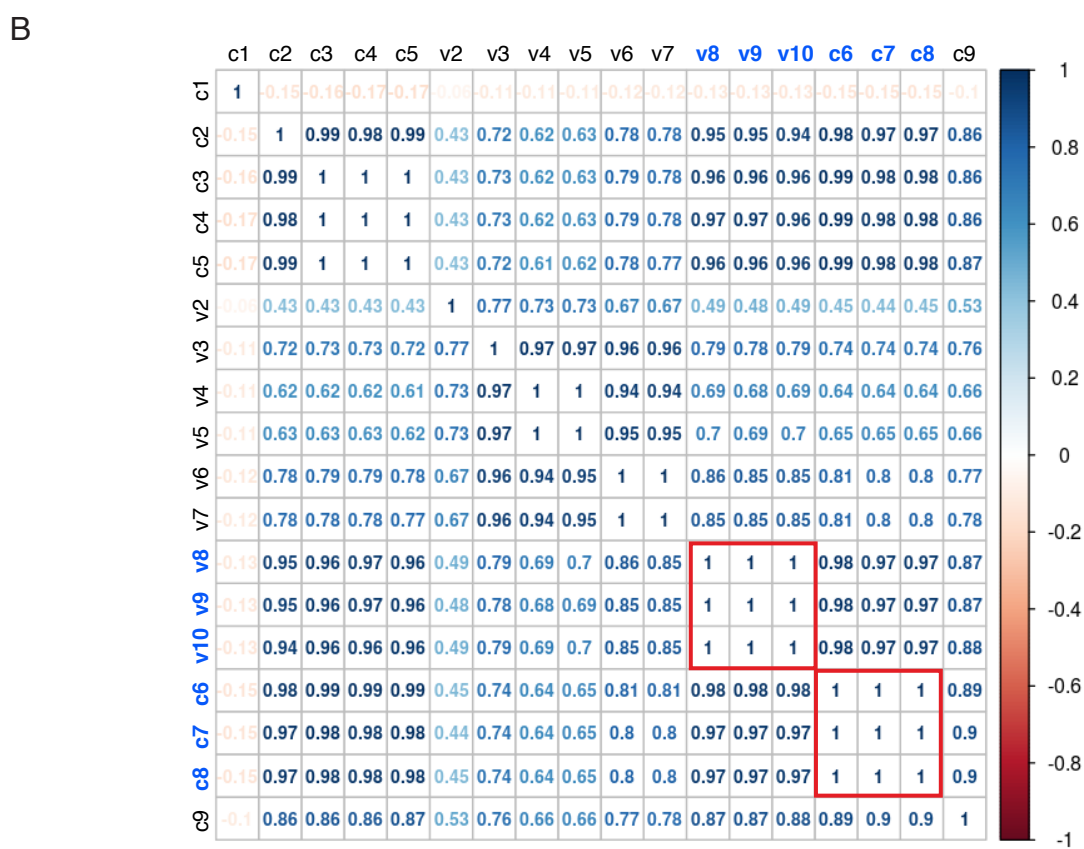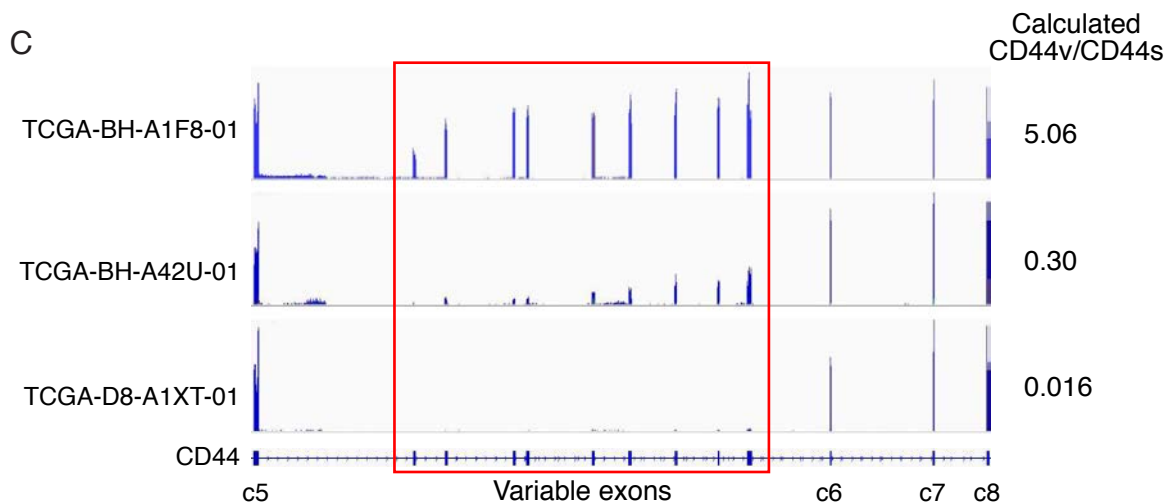

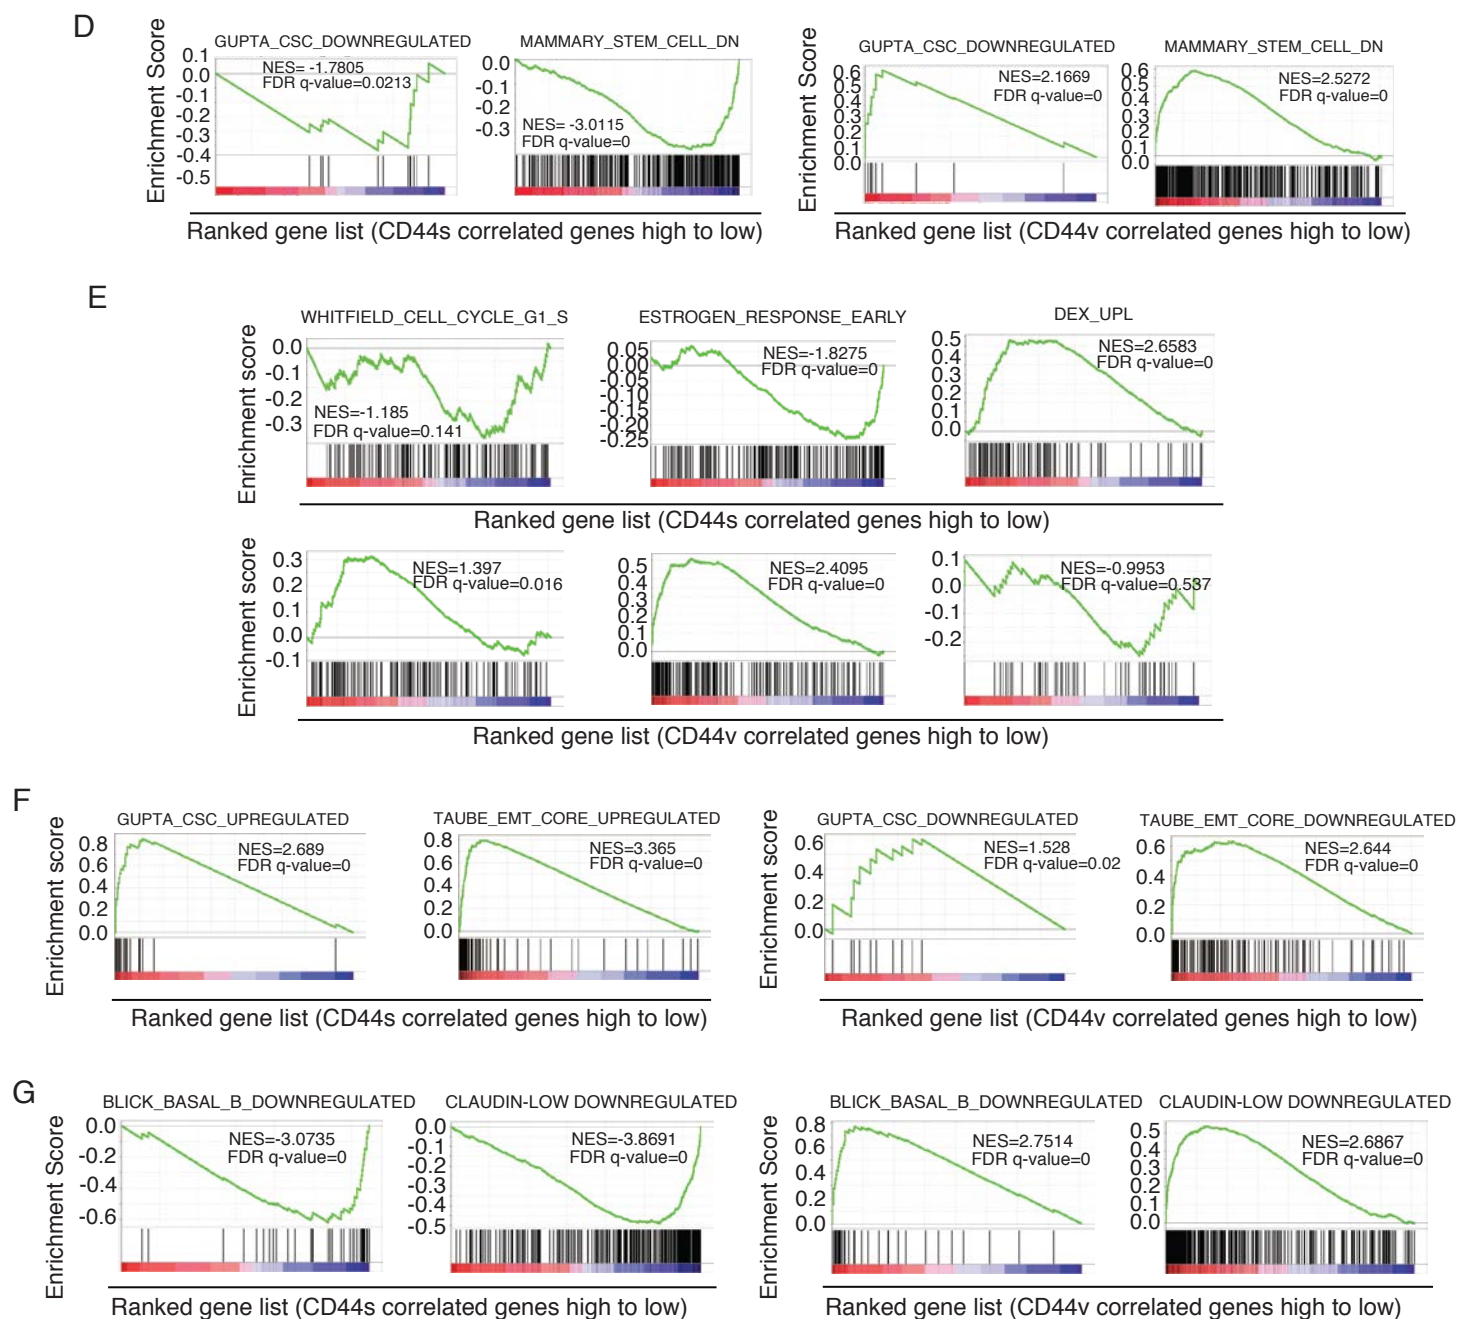

**Figure S1.** (A) Top, Diagram of human CD44 pre-mRNA depicting constitutive and variable exons. Bottom, CD44 exon expression in breast cancer patient TCGA dataset showing that exons v8, v9, and v10 were the most highly expressed variable exons, and exons c6, c7, and c8 were the most highly expressed constitutive exons. (B) Correlation of exon expression among different CD44 exons. Red boxes show the detected perfect correlations among v8, v9, and v10 or c6, c7, and c8. (C) IGV tracks showing CD44 reads distribution is in agreement with calculated CD44v to CD44s ratios. (D,E) GSEA of the Breast Cancer TCGA data showing inverted enrichments of CSC and mammary stem cell signatures (D), and G1-S, estrogen response early, and DEX\_UPL gene signatures (E) in CD44s- and CD44v-correlated gene lists. (F) GSEA of the CCLL dataset showing the positive enrichment of CSC and EMT gene signatures in the CD44s-correlated gene list and negative enrichment in the CD44v-correlated gene list. (G) GSEA showing inverted enrichments of the Basal\_B gene signature and Claudin\_low signature in the CD44s- and CD44v-correlated gene list.

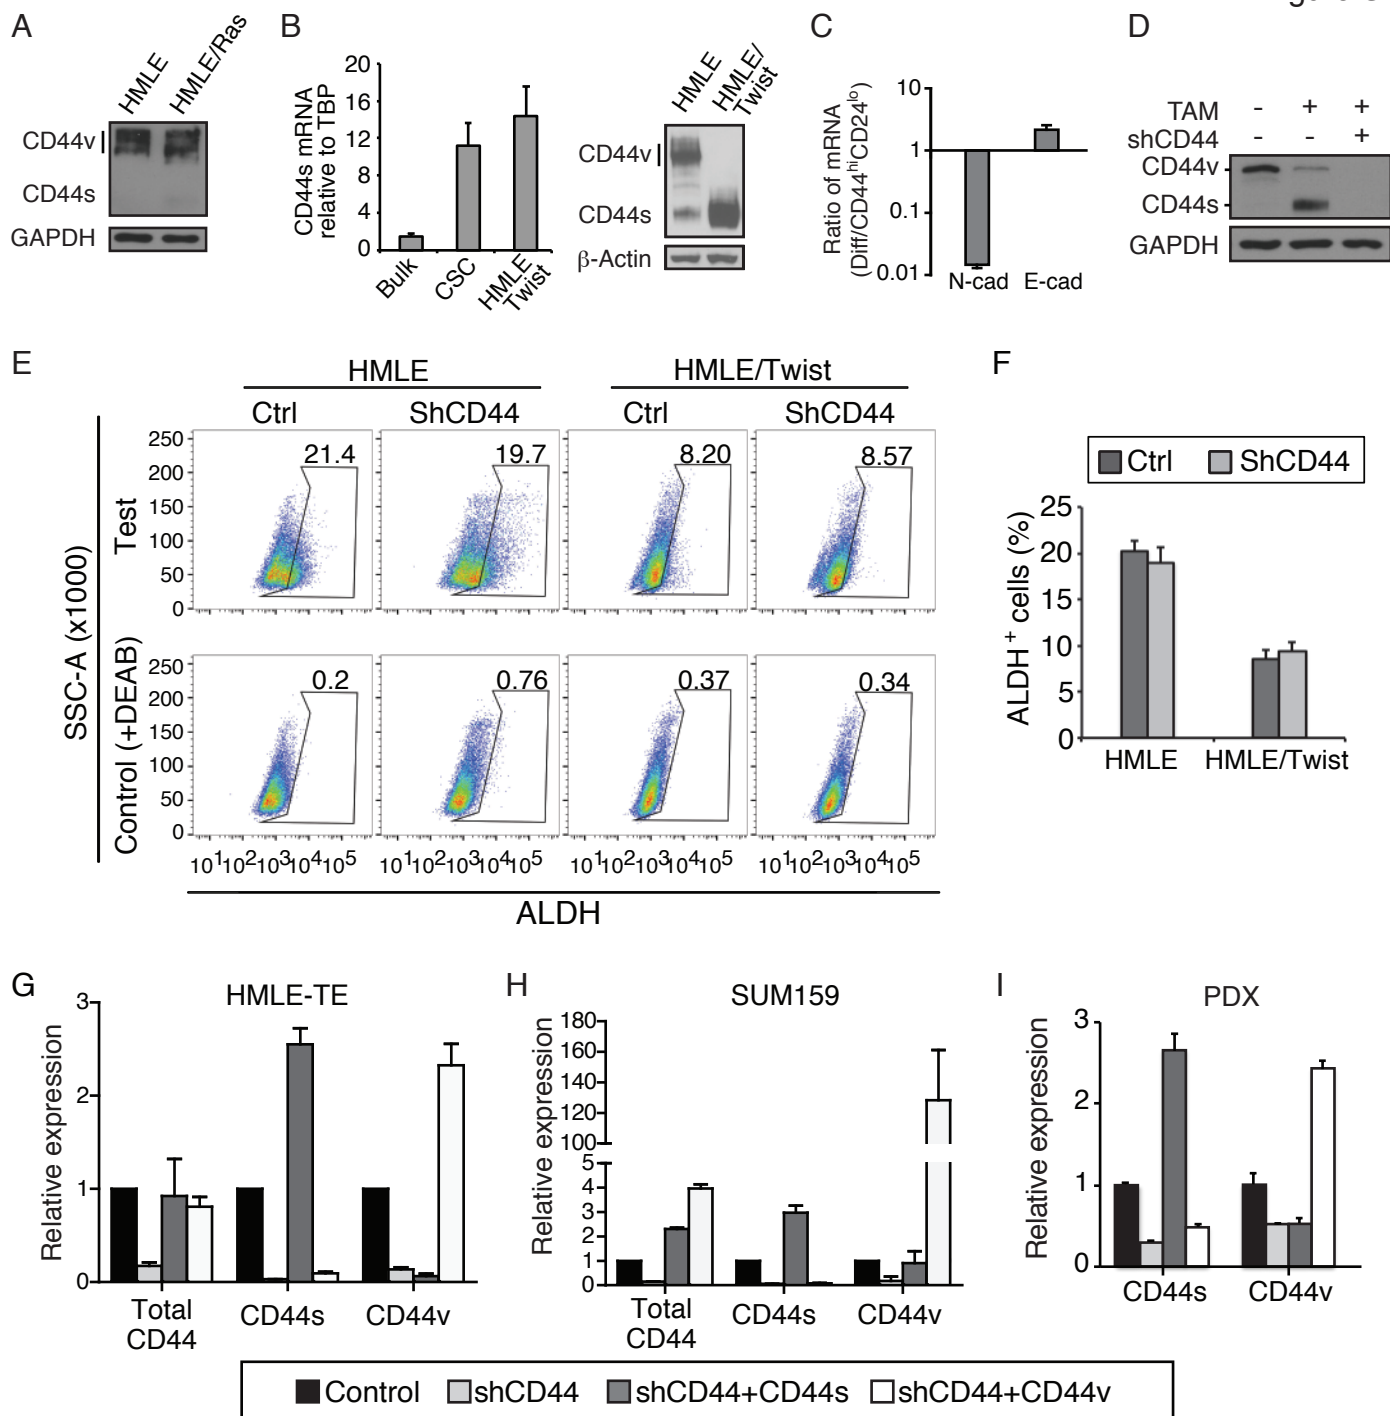

**Figure S2.** (A) Immunoblot of lysates from both HMLE and HMLE/Ras cells showing CD44v as the predominant isoform. The CD44v proteins ran in a cluster of bands due to post-translational modification of glycosylation. (B) Left Panel: mRNA levels of CD44s relative to TBP in Bulk, CD44<sup>hi</sup>/CD24<sup>lo</sup> population of HMLE cells, and HMLE/Twist cells. Right Panel: Immunoblot of lysates from HMLE and HMLE/Twist cells. (C) The CD44<sup>hi</sup>/CD24<sup>lo</sup> population of HMLE cells was grown in monolayer culture for 8 days. Relative mRNA levels of N-cadherin and E-cadherin at day 8 relative to day 0 are shown. (D) Immunoblot images showing the switch of CD44v to CD44s isoforms in TAM-treated HMLE/Twist-ER cells and knockdown efficiency of CD44 shRNA. (E,F) ALDH analysis in HMLE and HMLE/Twist cells that expressed control or CD44 shRNA. FACS images (E) and quantification of ALDH<sup>+</sup> cells (F) are shown. (G-I) qRT-PCR results showing relative expression levels of CD44s and CD44v in tamoxifen treated HMLE/Twist-ER (HMLE-TE, G), SUM159 (H), and PDX tumor cells (I) that expressed CD44 shRNA or co-expressed CD44 shRNA and the CD44s or CD44v cDNA.

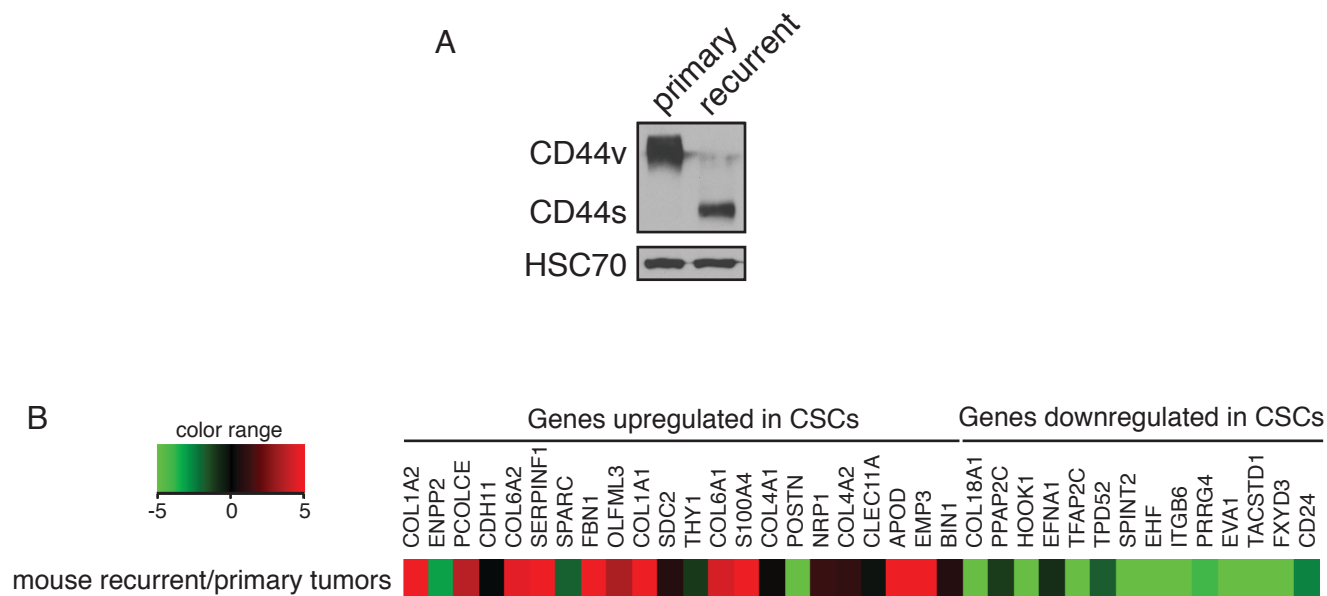

**Figure S3.** (A) Immunoblot images showing that CD44v is the predominant isoform in primary tumors and CD44s is the predominant isoform in recurrent tumors. (B) RNAs isolated from primary and recurrent breast tumors were analyzed by qRT-PCR for expression of the CSC signature. A heat plot of ratios of gene expression between recurrent and primary tumors is shown.

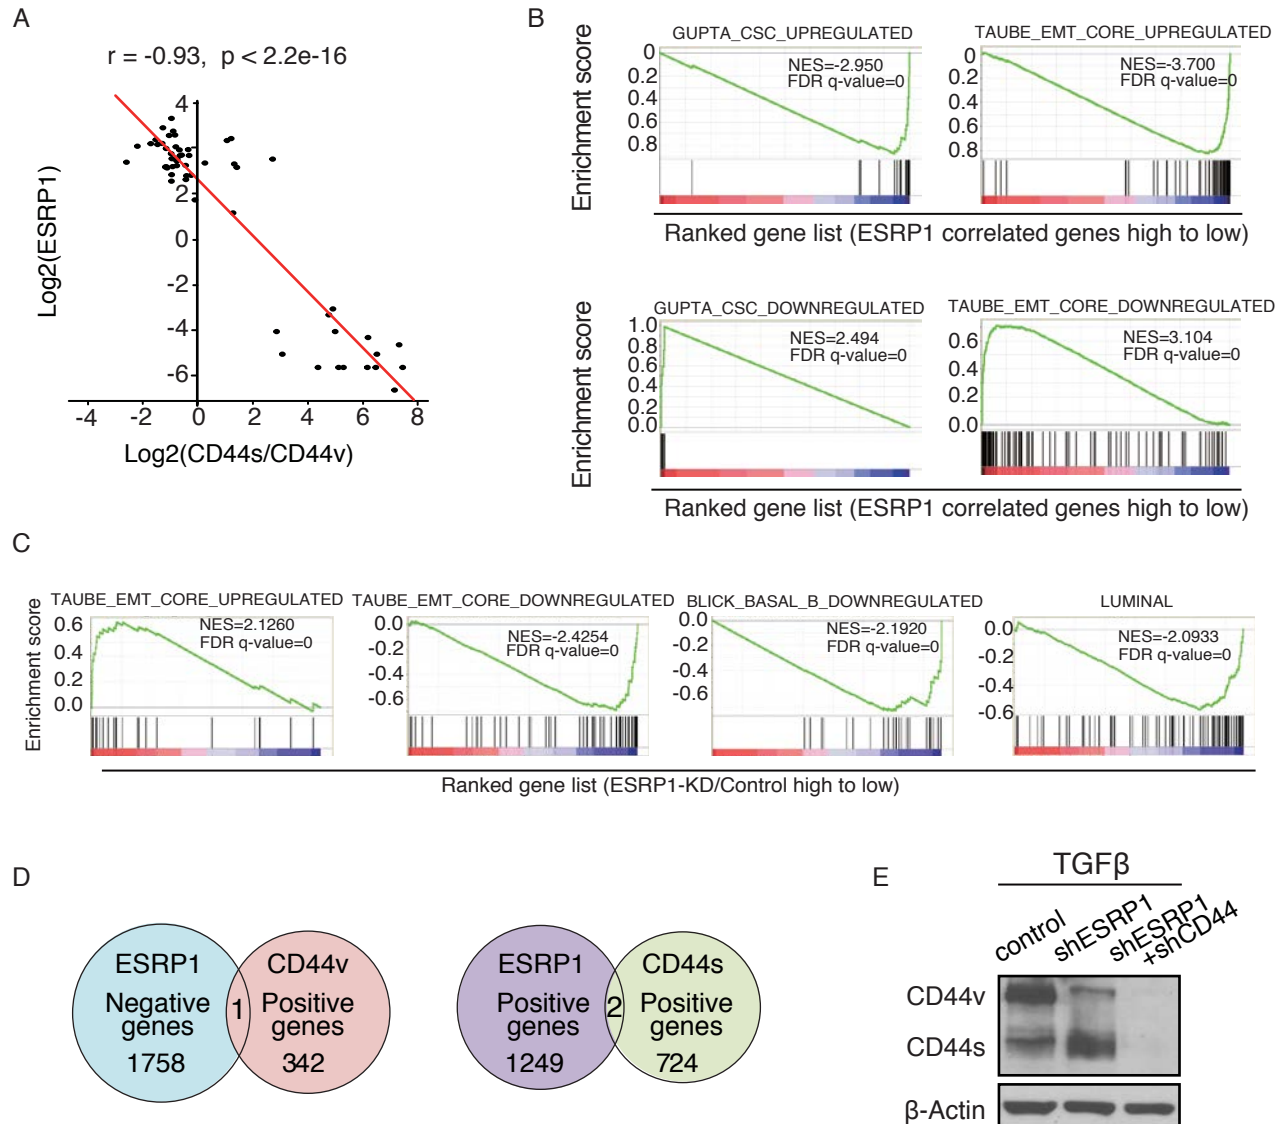

**Figure S4.** (A) Inverse correlation was shown between ESRP1 levels and the ratios of CD44s to CD44v using the CCLE Breast Cancer Cell line dataset. Log<sub>2</sub> values are plotted. (B) CCLE data analysis showing that the ESRP1 gene signature negatively correlated with the CSC and EMT gene signatures. (C) GSEA analyses showing the positive enrichment of EMT signature and negative enrichment in Basal-downregulated and Lumina subtype upon ESRP1 silencing. (D) Venn diagram plots showing the overlapping of ESRP1-, CD44v-, and CD44s-associated genes using the breast cancer TCGA dataset. (E) Immunoblot images showing expression levels of CD44s and CD44v in TGF $\beta$ -treated control HMLE cells or cells that expressed ESRP1 shRNA or both ESRP1 and CD44 shRNAs.

**A** CD44s Correlated Genes Ontology Analysis

| Category      | Term                                                 | P-Value  |
|---------------|------------------------------------------------------|----------|
| GOTERM_BP_FAT | response to wounding                                 | 2.10E-23 |
| GOTERM_BP_FAT | regulation of programmed cell death                  | 9.90E-12 |
| GOTERM_BP_FAT | cell adhesion                                        | 2.80E-07 |
| GOTERM_BP_FAT | regulation of cell proliferation                     | 8.00E-07 |
| GOTERM_BP_FAT | protein kinase cascade                               | 5.30E-06 |
| GOTERM_BP_FAT | cell surface receptor linked signal transduction     | 5.60E-06 |
| GOTERM_BP_FAT | positive regulation of response to external stimulus | 1.30E-04 |
| GOTERM_BP_FAT | positive regulation of cell communication            | 2.20E-04 |
| GOTERM_BP_FAT | cell migration                                       | 1.70E-03 |
| GOTERM_BP_FAT | cell motility                                        | 3.40E-03 |

**B** CD44v Correlated Genes Ontology Analysis

| Category      | Term                             | P-Value  |
|---------------|----------------------------------|----------|
| GOTERM_BP_FAT | cell morphogenesis               | 4.00E-03 |
| GOTERM_BP_FAT | biological adhesion              | 4.80E-03 |
| GOTERM_BP_FAT | cell adhesion                    | 4.90E-03 |
| GOTERM_BP_FAT | cell-cell adhesion               | 7.60E-03 |
| GOTERM_BP_FAT | cellular component morphogenesis | 1.10E-02 |
| GOTERM_BP_FAT | epithelial tube morphogenesis    | 4.10E-02 |

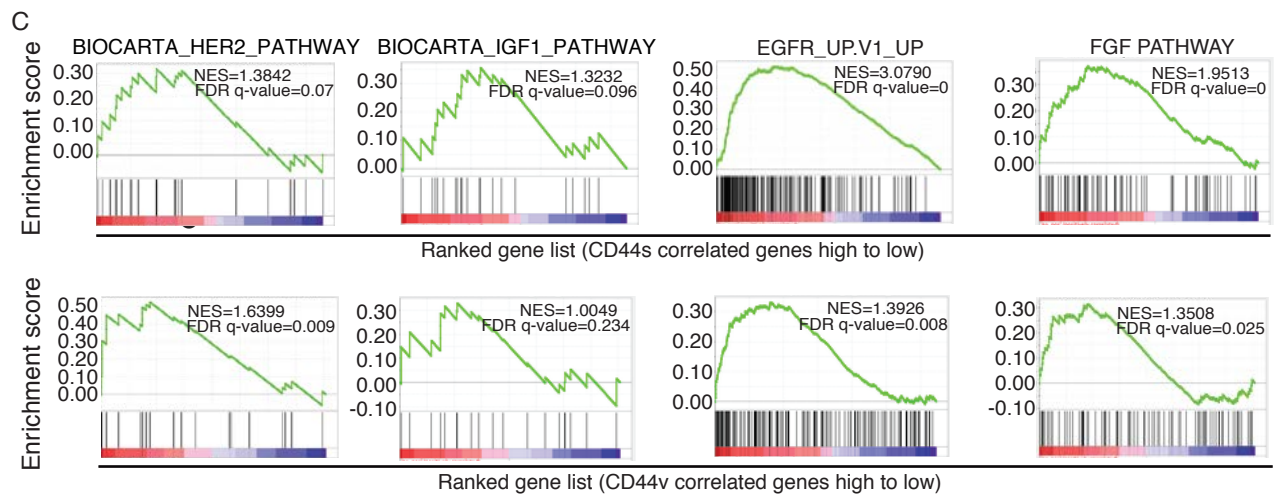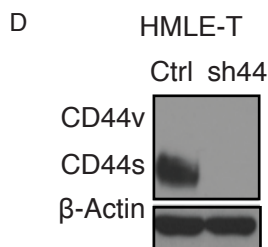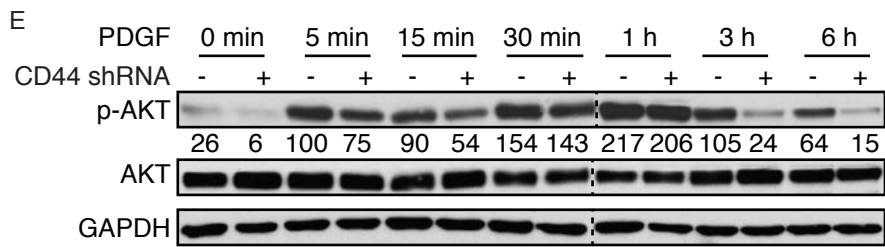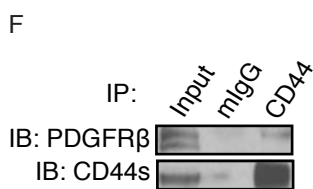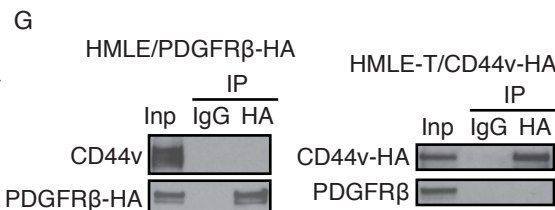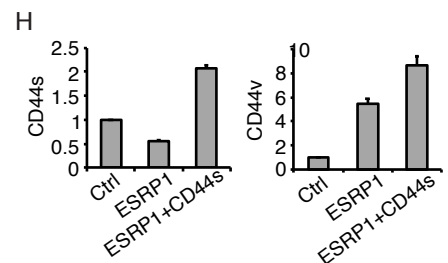

**Figure S5.** (A) Gene Ontology analysis of CD44s-correlated genes. (B) Gene Ontology analysis of CD44v-correlated genes. (C) GSEA analysis of HER2, IGF1, EGFR, and FGF pathway gene signatures in the CD44s- and CD44v-correlated gene lists. (D) Immunoblot images showing expression levels of CD44s and CD44v in HMLE-Twist (HMLE-T) cells that expressed control or CD44 shRNA. (E) Immunoblot of p-AKT, AKT and GAPDH in HMLE-Twist control and shCD44 cells. Cells were treated with PDGF(10 ng/ml) for the indicated time intervals. Relative intensity of phosphorylated to unphosphorylated AKT signals is depicted underneath of the images. (F) 293FT cells co-transfected with CD44s and FLAG-tagged PDGFR $\beta$  were subjected to CD44 immunoprecipitation (IP). (G) Co-immunoprecipitation (IP) experiments showing undetectable interaction between CD44v and PDGFR $\beta$ . PDGFR $\beta$ -HA cDNA or CD44v-HA cDNA was ectopically expressed in HMLE or HMLE-Twist cells, respectively. The co-IP was performed using an HA antibody and blotted for HA or CD44v or PDGFR $\beta$  as indicated. (H) Relative mRNA levels of CD44s and CD44v in HMLE/Twist cells that expressed ESRP1 cDNA or both ESRP1 and CD44s CDNA compared to control HMLE/Twist cells.

Figure S6

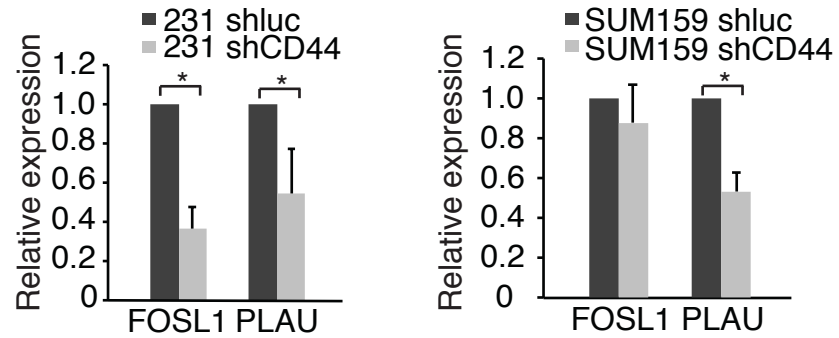

**Figure S6.** qRT-PCR showing relative expression levels of FOSL1 and PLAU in MDA-MB-231 cells (control and shCD44) and SUM159 cells (control and shCD44). Error bars indicates SEM. \* P < 0.05.



## SUPPLEMENTAL METHOD

### Bioinformatics analyses of CD44 splice isoforms and associated biological pathways

The TCGA breast invasive carcinoma (BRCA) exon expression dataset by RNAseq (polyA+ IlluminaHiSeq) was downloaded from UCSC cancer browser. This cancer browser is now replaced by a new platform UCSC Xena browser (<https://xenabrowser.net/datapages/>).

The exon expression dataset measures the expression levels of individual exons in RPKM (Reads Per Kilobase of exon model per Million mapped reads). In theory, different exons in the same transcript isoform are expected to have the same RPKM expression values. However, two factors can impact exon expression levels. It has been observed that longer exons show relatively lower expression values. Therefore, the most 5' and 3' exons, which are usually larger-size exons compared to internal exons, show relative lower RPKM values. With this consideration, we excluded the use of 5' and 3' exons. Moreover, polyA-primed reverse transcription was used as a RNA-seq platform. This sequencing method resulted in a gradual decline of sequencing coverage from 3' to 5'. Thus, exons located at the 3' end were preferential considered when calculating isoform expression levels.

Fig. S1A depicts the CD44 exon structure. CD44v is composed of a family of CD44 mRNA that includes at least one of the nine variable exons. CD44s, on the other hand, is devoid of all variable exons. Our analysis of the more than 1000 specimens in the BRCA-TCGA dataset shows that v8, v9, v10 exons are almost always among the highest expressed CD44 variable exons (Fig. S1A) and are most highly correlated with each other (Fig. S1B). This observation is consistent with the structure of CD44v where these three variable exons are included in most of the CD44v isoforms, including CD44v3-10, CD44v6-10, and CD44v8-10 (1, 2). Likewise, constitutive exons c6, c7, c8 show highest expression and are mostly highly correlated (Fig. S1A, bottom panel). These constitutive exons also locate adjacent to v8-v10 exons. Thus, these results led us to use the average exon expression levels of v8, v9, v10 to represent CD44v and the average expression levels of c6, c7, c8 for total CD44. We used linear expression levels to calculate the levels of CD44v and total CD44. We then performed subtraction between total CD44 and CD44v to obtain levels of CD44s.

To determine the biological traits that are associated with CD44 splice isoforms, we performed GSEA analysis. We extracted CD44 isoform-associated gene lists by performing correlation analysis of CD44 isoform expression to the whole transcriptome. The correlation to CD44 splice isoforms was used to pre-rank the gene list and to perform GSEA analysis (3, 4). In addition to utilizing the signatures from the C2 and C5 collections in MsigDB (<http://software.broadinstitute.org/gsea/msigdb/index.jsp>), we utilized several of our own curated signatures. These signatures were derived from published literatures, including gene expression profiles of mouse MaSC and luminal progenitor enriched population use either Lin-/CD24/CD29 profiles (5, 6) and human CSC signatures originated studies (7-10).

For splicing factor analysis, splicing factors were extracted from Gene Ontology Consortium terms GO:0000380 and GO:0043484. Gene expression of these factors was downloaded from TCGA database. Correlation of each splicing factor to the ratio of CD44s/CD44v was measured using Pearson correlation coefficient. Splicing factors with absolute

Pearson correlation coefficient > 0.3 and P-value (Permutation test, randomly shuffled 100,000 times) < 10<sup>-6</sup> were selected.

#### REFERENCES:

1. Ponta, H., Sherman, L., and Herrlich, P.A. 2003. CD44: from adhesion molecules to signalling regulators. *Nat Rev Mol Cell Biol* 4:33-45.
2. Zoller, M. 2011. CD44: can a cancer-initiating cell profit from an abundantly expressed molecule? *Nat Rev Cancer* 11:254-267.
3. Mootha, V.K., Lindgren, C.M., Eriksson, K.F., Subramanian, A., Sihag, S., Lehar, J., Puigserver, P., Carlsson, E., Ridderstrale, M., Laurila, E., et al. 2003. PGC-1alpha-responsive genes involved in oxidative phosphorylation are coordinately downregulated in human diabetes. *Nat Genet* 34:267-273.
4. Subramanian, A., Tamayo, P., Mootha, V.K., Mukherjee, S., Ebert, B.L., Gillette, M.A., Paulovich, A., Pomeroy, S.L., Golub, T.R., Lander, E.S., et al. 2005. Gene set enrichment analysis: a knowledge-based approach for interpreting genome-wide expression profiles. *Proc Natl Acad Sci U S A* 102:15545-15550.
5. Chakrabarti, R., Wei, Y., Hwang, J., Hang, X., Andres Blanco, M., Choudhury, A., Tiede, B., Romano, R.A., DeCoste, C., Mercatali, L., et al. 2014. DeltaNp63 promotes stem cell activity in mammary gland development and basal-like breast cancer by enhancing Fzd7 expression and Wnt signalling. *Nat Cell Biol* 16:1004-1015, 1001-1013.
6. Asselin-Labat, M.L., Vaillant, F., Sheridan, J.M., Pal, B., Wu, D., Simpson, E.R., Yasuda, H., Smyth, G.K., Martin, T.J., Lindeman, G.J., et al. 2010. Control of mammary stem cell function by steroid hormone signalling. *Nature* 465:798-802.
7. Blick, T., Hugo, H., Widodo, E., Waltham, M., Pinto, C., Mani, S.A., Weinberg, R.A., Neve, R.M., Lenburg, M.E., and Thompson, E.W. 2010. Epithelial mesenchymal transition traits in human breast cancer cell lines parallel the CD44(hi)/CD24 (lo/-) stem cell phenotype in human breast cancer. *J Mammary Gland Biol Neoplasia* 15:235-252.
8. Gupta, P.B., Onder, T.T., Jiang, G., Tao, K., Kuperwasser, C., Weinberg, R.A., and Lander, E.S. 2009. Identification of selective inhibitors of cancer stem cells by high-throughput screening. *Cell* 138:645-659.
9. Taube, J.H., Herschkowitz, J.I., Komurov, K., Zhou, A.Y., Gupta, S., Yang, J., Hartwell, K., Onder, T.T., Gupta, P.B., Evans, K.W., et al. 2010. Core epithelial-to-mesenchymal transition interactome gene-expression signature is associated with claudin-low and metaplastic breast cancer subtypes. *Proc Natl Acad Sci U S A* 107:15449-15454.
10. Hennessy, B.T., Gonzalez-Angulo, A.M., Stenke-Hale, K., Gilcrease, M.Z., Krishnamurthy, S., Lee, J.S., Fridlyand, J., Sahin, A., Agarwal, R., Joy, C., et al. 2009. Characterization of a naturally occurring breast cancer subset enriched in epithelial-to-mesenchymal transition and stem cell characteristics. *Cancer Res* 69:4116-4124.

**Table S1**

| <b>CD44s correlated gene list</b> |             |  | <b>CD44v correlated gene list</b> |             |
|-----------------------------------|-------------|--|-----------------------------------|-------------|
| Gene Name                         | Correlation |  | Gene Name                         | Correlation |
| CD44                              | 0.872447058 |  | CD44                              | 0.99749632  |
| TLR8                              | 0.436266094 |  | TRPS1                             | 0.40683844  |
| MPEG1                             | 0.433311524 |  | TCF20                             | 0.36857307  |
| MSN                               | 0.419633489 |  | AFTPH                             | 0.36565682  |
| PDCD1LG2                          | 0.411900595 |  | TLR5                              | 0.36506708  |
| CSF2RB                            | 0.403358739 |  | IRF6                              | 0.36472871  |
| PLEK                              | 0.40196431  |  | SLC1A2                            | 0.36237749  |
| RPS6KA1                           | 0.400750847 |  | VTCN1                             | 0.36066084  |
| SERPINB8                          | 0.394588253 |  | VDR                               | 0.35906801  |
| C1orf204                          | 0.393248766 |  | RCAN3                             | 0.3586608   |
| LRRC8C                            | 0.391253568 |  | TTLL1                             | 0.35815741  |
| IL10RA                            | 0.391036241 |  | BSPRY                             | 0.35651686  |
| LYN                               | 0.390369145 |  | CLCN3                             | 0.355839    |
| PTAFR                             | 0.388993691 |  | NIPAL3                            | 0.35412812  |
| SRGN                              | 0.388616026 |  | TARBP1                            | 0.35393086  |
| CYTH4                             | 0.387994489 |  | B3GNT2                            | 0.35295607  |
| DOK2                              | 0.387023945 |  | SLK                               | 0.35293466  |
| SIRPB2                            | 0.384623272 |  | ENAH                              | 0.35218226  |
| CD40                              | 0.382275563 |  | TMEM26                            | 0.3511772   |
| CD97                              | 0.381967555 |  | LOC10012853                       | 0.34956747  |
| TAGAP                             | 0.381638486 |  | MAP3K7                            | 0.34743409  |
| SOD2                              | 0.381601567 |  | TNK1                              | 0.34389328  |
| CSF1R                             | 0.381259077 |  | RASEF                             | 0.34219578  |
| CD14                              | 0.381244952 |  | KIF13A                            | 0.34211773  |
| CD53                              | 0.380248474 |  | LDLRAD3                           | 0.341623    |
| CCR5                              | 0.379689344 |  | STAT3                             | 0.34018355  |
| CD4                               | 0.379323838 |  | DLG1                              | 0.34010802  |
| TNFAIP8                           | 0.379051868 |  | SYT7                              | 0.34004117  |
| FGL2                              | 0.378673267 |  | WDR31                             | 0.33927819  |
| CXorf21                           | 0.378291815 |  | ZNF185                            | 0.33758925  |
| SNX20                             | 0.378215855 |  | PRRG4                             | 0.33751009  |
| FGR                               | 0.376451876 |  | TMEM241                           | 0.33725352  |
| CD28                              | 0.375479931 |  | LRRC8E                            | 0.33687255  |
| SPN                               | 0.375445685 |  | WWC1                              | 0.33547581  |
| SEPT9                             | 0.375424783 |  | SMPDL3B                           | 0.33257909  |
| VNN1                              | 0.375308908 |  | ATP1A1OS                          | 0.33190942  |
| IL15RA                            | 0.374493716 |  | STXBP2                            | 0.33157797  |

|             |             |  |             |            |
|-------------|-------------|--|-------------|------------|
| CYBB        | 0.374482364 |  | TTC17       | 0.32945208 |
| KIAA0226L   | 0.373987455 |  | VAPA        | 0.32858956 |
| AIF1        | 0.373902802 |  | LOC10065277 | 0.32844061 |
| ARHGAP25    | 0.373594556 |  | ETAA1       | 0.32835859 |
| PIK3AP1     | 0.373531849 |  | ATXN10      | 0.32758509 |
| ICAM1       | 0.368821189 |  | UBIAD1      | 0.32730539 |
| CLEC4A      | 0.368419871 |  | AP1AR       | 0.32713375 |
| C1orf38     | 0.36736005  |  | MREG        | 0.3260403  |
| CCL13       | 0.366195123 |  | HIVEP3      | 0.32550202 |
| HLA-DOA     | 0.366180944 |  | RBBP8,MIR47 | 0.32521645 |
| SASH3       | 0.366127528 |  | TFCP2L1     | 0.32468779 |
| CTSS        | 0.366114246 |  | SSX2IP      | 0.32436738 |
| SLA         | 0.366093376 |  | TMEM125     | 0.32416448 |
| SELPLG      | 0.36556177  |  | PKP4        | 0.32415074 |
| NCKAP1L     | 0.365170995 |  | ACTR3B      | 0.3219082  |
| LRRC33      | 0.36498645  |  | TXLNA       | 0.32133202 |
| SLC1A3      | 0.364740734 |  | CHDH        | 0.32054579 |
| LOC10013095 | 0.364617786 |  | KIAA1217    | 0.3201147  |
| FERMT3      | 0.363971401 |  | C15orf33    | 0.31981316 |
| CD180       | 0.363960172 |  | ASB13       | 0.31976611 |
| PLEKHO2     | 0.363925484 |  | ZMYM4       | 0.31881502 |
| CCR2        | 0.363225511 |  | TFIP11      | 0.31842123 |
| HLA-DMB     | 0.363162694 |  | HAT1        | 0.31839363 |
| PRF1        | 0.362887082 |  | ADSS        | 0.31832345 |
| STX11       | 0.362064655 |  | SEPT9       | 0.3182576  |
| EVI2B       | 0.361558768 |  | SERPINA3    | 0.31825572 |
| SLCO2B1     | 0.36001578  |  | SRRM1       | 0.31819552 |
| GVINP1      | 0.359054733 |  | ZCCHC7      | 0.31813627 |
| TMEM176B    | 0.358117579 |  | MAP3K1      | 0.31775311 |
| FCGR2B      | 0.358052915 |  | RAPH1       | 0.31765403 |
| IKZF1       | 0.357922255 |  | EXOC1       | 0.31737275 |
| DOCK2       | 0.357827748 |  | CHMP4C      | 0.31702855 |
| NCK1        | 0.357785596 |  | YY1AP1      | 0.31697119 |
| HCLS1       | 0.356634188 |  | DSP         | 0.3166744  |
| HVCN1       | 0.356311854 |  | C1RL        | 0.31665547 |
| ACOT9       | 0.355528408 |  | CLSTN1      | 0.31611964 |
| APOBEC3C    | 0.355110246 |  | KCTD1       | 0.31587618 |
| SLAMF8      | 0.354911185 |  | GRHL2       | 0.31570547 |
| TIFAB       | 0.354891891 |  | SPINT2      | 0.31569271 |
| OBFC2A      | 0.354262942 |  | YTHDF2      | 0.31549248 |
| NCF4        | 0.354200447 |  | NEBL        | 0.31541463 |
| LRRC25      | 0.353175793 |  | ABI1        | 0.31526413 |

|               |             |  |          |            |
|---------------|-------------|--|----------|------------|
| AMICA1        | 0.3527306   |  | CHSY1    | 0.31513791 |
| NCF1          | 0.352508001 |  | SLC25A17 | 0.31507351 |
| TMEM173       | 0.35250537  |  | NUMA1    | 0.31463971 |
| CD33          | 0.352321586 |  | CTNNB1   | 0.31453348 |
| TNFRSF8       | 0.352183948 |  | CDCP1    | 0.31406276 |
| TNFRSF1B      | 0.352074789 |  | ATP1B1   | 0.3140267  |
| CCND2         | 0.351879612 |  | PRRG2    | 0.31373943 |
| LILRB2        | 0.351870818 |  | SDCCAG8  | 0.3135241  |
| LOC10050581   | 0.351787453 |  | STXBP3   | 0.31342984 |
| CST7          | 0.351281727 |  | POT1     | 0.31335114 |
| IL18BP        | 0.350866653 |  | LDOC1L   | 0.31322447 |
| TNFRSF9       | 0.350534942 |  | KIAA1522 | 0.31318088 |
| INPP5D        | 0.350350938 |  | USP54    | 0.31315222 |
| LAIR1         | 0.350002174 |  | SNRNP40  | 0.31312131 |
| PSD4          | 0.349951287 |  | HOOK1    | 0.31298747 |
| GLIPR1        | 0.349917104 |  | RSBN1L   | 0.31270369 |
| SLAMF1        | 0.349781611 |  | CAMSAP3  | 0.31267664 |
| RUNX3         | 0.349694493 |  | WDR35    | 0.31258713 |
| IL2RA         | 0.349327653 |  | C1orf109 | 0.31238441 |
| PIK3CG        | 0.349259905 |  | KIAA1671 | 0.31228474 |
| PAQR8         | 0.348875132 |  | C5orf28  | 0.31225764 |
| ITGAL         | 0.348647208 |  | CCDC28A  | 0.31217149 |
| CLEC4E        | 0.348548139 |  | SPTBN1   | 0.31186696 |
| CD68          | 0.348516826 |  | ARHGEF2  | 0.31174149 |
| GIMAP1-GIMAP2 | 0.348366742 |  | CGNL1    | 0.31173989 |
| CYTIP         | 0.348341883 |  | KIAA0040 | 0.31167894 |
| CLEC10A       | 0.347943653 |  | KANSL1   | 0.31154163 |
| CELF2         | 0.347823599 |  | TBX3     | 0.31139257 |
| LPXN          | 0.347723862 |  | USP43    | 0.31096344 |
| KLHL6         | 0.347173109 |  | NUP50    | 0.31087485 |
| CD274         | 0.346986792 |  | SH2D3A   | 0.31049164 |
| IL7R          | 0.346782111 |  | AGPAT5   | 0.31045971 |
| MDFIC         | 0.346617351 |  | KIAA0895 | 0.31038068 |
| BATF3         | 0.34642437  |  | AP1M2    | 0.31023572 |
| SIGLEC10      | 0.345714358 |  | BAIAP2L1 | 0.31018033 |
| ALOX5AP       | 0.345650062 |  | SLC11A2  | 0.31017238 |
| FLI1          | 0.345226765 |  | ZNF627   | 0.3098785  |
| SIGLEC5       | 0.344884822 |  | CAPRIN1  | 0.30984835 |
| NFAM1         | 0.344334901 |  | OMA1     | 0.30979806 |
| EVI2A         | 0.343913534 |  | HNRNPC   | 0.30975676 |
| CD200R1       | 0.343864566 |  | EYA3     | 0.30969042 |
| AP1S2         | 0.343713782 |  | CNKSR1   | 0.30962642 |

|          |             |  |             |            |
|----------|-------------|--|-------------|------------|
| PTPRC    | 0.343672589 |  | C4orf36     | 0.30952814 |
| VSIG4    | 0.343234253 |  | DCAKD       | 0.30944461 |
| RIN3     | 0.343210528 |  | CELSR2      | 0.3094255  |
| C16orf54 | 0.343105854 |  | SLC25A15    | 0.30941774 |
| LIMK1    | 0.3430513   |  | LRRC42      | 0.30933741 |
| TOR4A    | 0.342890701 |  | SLC44A1     | 0.30914657 |
| ACOT7    | 0.342836082 |  | TMEM63A     | 0.30899281 |
| CSF2RA   | 0.342726995 |  | LIMK2       | 0.30897653 |
| LAX1     | 0.342703505 |  | MYO6        | 0.30897184 |
| P2RY13   | 0.342492571 |  | TMEM154     | 0.3089383  |
| GLIPR2   | 0.342459114 |  | ABCD3       | 0.30852004 |
| SH3KBP1  | 0.342167149 |  | MYB         | 0.30827811 |
| MAPRE2   | 0.342052365 |  | C1orf210    | 0.30826605 |
| HCK      | 0.342007337 |  | EIF2A       | 0.30819988 |
| FGD2     | 0.341901158 |  | HDAC1       | 0.30798957 |
| IGFLR1   | 0.341798659 |  | RBBP4       | 0.30798201 |
| ICAM3    | 0.341295317 |  | FBXO3       | 0.30798175 |
| MNDA     | 0.341199524 |  | PROM2       | 0.30783484 |
| FAM49A   | 0.340983892 |  | ARHGEF5     | 0.30781867 |
| CCDC82   | 0.340874113 |  | ASB3,GPR75- | 0.30759319 |
| FCN1     | 0.340667723 |  | PHACTR4     | 0.30757244 |
| ITGB2    | 0.340664767 |  | CEACAM1     | 0.30752034 |
| DNM2     | 0.34001811  |  | OFD1        | 0.30749315 |
| C1R      | 0.339962443 |  | SLMAP       | 0.30745491 |
| MILR1    | 0.339668482 |  | MKL1        | 0.30738049 |
| IFI16    | 0.33954464  |  | COPG2       | 0.30729599 |
| IFNAR2   | 0.338754259 |  | GGA1        | 0.30728386 |
| PPP1R18  | 0.338142229 |  | EPHA1       | 0.30724083 |
| SAMSN1   | 0.337746186 |  | RAB8A       | 0.30708488 |
| CXCR6    | 0.337589277 |  | PRKRA       | 0.30705745 |
| IRF4     | 0.337382831 |  | ZZZ3        | 0.30703983 |
| CD74     | 0.337080755 |  | PHKA1       | 0.30701913 |
| CD226    | 0.336822104 |  | AGAP1       | 0.30694038 |
| CARD6    | 0.336610299 |  | SLC35E1     | 0.30651885 |
| TC2N     | 0.336379561 |  | RARG        | 0.30651627 |
| MS4A4A   | 0.33628115  |  | TCTN2       | 0.30643613 |
| LILRB3   | 0.335774588 |  | PTPRF       | 0.30631817 |
| CHST11   | 0.335751022 |  | ZNF33A      | 0.30608727 |
| EVL      | 0.335668699 |  | ARMCX2      | 0.30605105 |
| TCN2     | 0.33561173  |  | SEMA4A      | 0.30603252 |
| GPR174   | 0.3355902   |  | ZNF33B      | 0.30597247 |
| TNFAIP3  | 0.335395483 |  | JUP         | 0.30588351 |

|           |             |  |            |            |
|-----------|-------------|--|------------|------------|
| CD163     | 0.335370036 |  | BRD4       | 0.30572172 |
| PIK3R5    | 0.335337072 |  | SPIN1      | 0.30561736 |
| ACSL4     | 0.335166384 |  | TRIM44     | 0.30558867 |
| TLR4      | 0.335078693 |  | COPG2,TSGA | 0.30549601 |
| ETS1      | 0.334752963 |  | XYLB       | 0.30545979 |
| CYP7B1    | 0.33473615  |  | METTLL15   | 0.30537256 |
| SIRPA     | 0.334363025 |  | MYO5B      | 0.30536773 |
| C3AR1     | 0.334251837 |  | ATP1A1     | 0.30534719 |
| LIX1L     | 0.334199664 |  | SEMA4B     | 0.30532774 |
| IL7       | 0.333909315 |  | PKP3       | 0.30527969 |
| CPVL      | 0.333824601 |  | ERBB3      | 0.30527479 |
| TBX21     | 0.333431564 |  | FOCAD      | 0.30520645 |
| NCF1B     | 0.333384731 |  | PPP1R9A    | 0.305113   |
| TLR2      | 0.333381901 |  | CLDN12     | 0.30506467 |
| LOC283888 | 0.333374811 |  | NUMB       | 0.30504264 |
| LYZ       | 0.333094737 |  | ITGB8      | 0.30487816 |
| SYT11     | 0.332945386 |  | CEP70      | 0.30484084 |
| CD59      | 0.332936648 |  | DDX17      | 0.30473986 |
| EMP3      | 0.332803459 |  | ETV6       | 0.30472755 |
| MFNG      | 0.332138679 |  | CASZ1      | 0.30463407 |
| CMKLR1    | 0.332099921 |  | DNAJC16    | 0.30461898 |
| CD300A    | 0.332005176 |  | NUP35      | 0.30457237 |
| SLAMF6    | 0.331985539 |  | CDS1       | 0.30452827 |
| CD86      | 0.33190795  |  | KDM3A      | 0.30450884 |
| MSC       | 0.331815256 |  | SOGA2      | 0.30438142 |
| GAB3      | 0.331621436 |  | RBM47      | 0.30436077 |
| LGI2      | 0.331611315 |  | PGM2       | 0.30429259 |
| BIN2      | 0.331523214 |  | TMEM168    | 0.30416005 |
| KCNAB2    | 0.331503029 |  | SF3A1      | 0.30413963 |
| GRAP2     | 0.331494122 |  | PICK1      | 0.3041336  |
| ANKRD44   | 0.331109415 |  | CABIN1     | 0.30406399 |
| CD3G      | 0.330949053 |  | RPS6KA1    | 0.30402086 |
| SH2D1A    | 0.330526096 |  | RSL1D1     | 0.30398033 |
| FPR1      | 0.330406483 |  | CHPT1      | 0.30394407 |
| CRTAM     | 0.32958559  |  | IL17RB     | 0.30388839 |
| LILRB1    | 0.329579574 |  | FAM83F     | 0.30379925 |
| FYB       | 0.329375861 |  | KDM1A      | 0.30374831 |
| TNFSF8    | 0.329350396 |  | AMBRA1     | 0.30363002 |
| RASSF4    | 0.329338392 |  | MAP7       | 0.30361539 |
| FAM20A    | 0.329228552 |  | ESRP1      | 0.30347434 |
| EOMES     | 0.329096808 |  | SLC25A12   | 0.3034393  |
| C10orf54  | 0.329068157 |  | C3orf17    | 0.30330309 |

|             |             |  |          |            |
|-------------|-------------|--|----------|------------|
| LRMP        | 0.329056956 |  | ABI2     | 0.30330103 |
| ELMO1       | 0.328995544 |  | DSG2     | 0.30329687 |
| HAPLN3      | 0.328917596 |  | CXADR    | 0.30328422 |
| ARHGAP30    | 0.328708378 |  | HOMER2   | 0.30328106 |
| WIPF1       | 0.328505417 |  | IMPACT   | 0.30310174 |
| IRAK2       | 0.328099488 |  | SS18     | 0.30294586 |
| VIM         | 0.327905213 |  | CELSR1   | 0.30289381 |
| NKG7        | 0.327900916 |  | MAP3K9   | 0.30284879 |
| BTN3A2      | 0.327737396 |  | C15orf44 | 0.30283694 |
| LILRB4      | 0.327711994 |  | OLA1     | 0.30282821 |
| GZMB        | 0.327686351 |  | RGNEF    | 0.30278756 |
| LOC10023320 | 0.327498536 |  | APP      | 0.30274939 |
| CD247       | 0.327226038 |  | RBBP8    | 0.30266839 |
| JAZF1       | 0.327137819 |  | ZNF37A   | 0.30263566 |
| CSF1        | 0.326787655 |  | L3MBTL2  | 0.30262954 |
| HLA-DQA1    | 0.326763391 |  | SIPA1L3  | 0.30262373 |
| SLAMF7      | 0.326639321 |  | INADL    | 0.30257927 |
| FUT4        | 0.326576855 |  | PRLR     | 0.30256664 |
| DPYD        | 0.326543518 |  | AUH      | 0.30256572 |
| IL21R       | 0.326255975 |  | DNAL4    | 0.30255359 |
| ADCY7       | 0.326218398 |  | API5     | 0.3025148  |
| PTGER4      | 0.326172655 |  | PVRL4    | 0.30247705 |
| GPR65       | 0.326012801 |  | ZNF791   | 0.30245145 |
| HLA-DRA     | 0.3258517   |  | SLC44A3  | 0.30241609 |
| SLC9A9      | 0.325556464 |  | GGA2     | 0.3024102  |
| KLRD1       | 0.325508103 |  | CSNK1G3  | 0.30235333 |
| IL10        | 0.325414342 |  | FBXO30   | 0.30233912 |
| HLA-DRB5    | 0.325293165 |  | PON2     | 0.30231889 |
| HLA-DPB1    | 0.325225521 |  | SREBF2   | 0.30231238 |
| GPR183      | 0.324802824 |  | PPP6R2   | 0.30230668 |
| PTPN7       | 0.324714732 |  | DDX31    | 0.30227548 |
| CD96        | 0.324688012 |  | DEPDC5   | 0.30226639 |
| GIMAP1      | 0.324347638 |  | FHDC1    | 0.30226313 |
| MS4A6A      | 0.324330074 |  | PPP4R1   | 0.30217944 |
| TBXAS1      | 0.324266997 |  | DYNLT3   | 0.30215219 |
| AKNA        | 0.324166671 |  | CHERP    | 0.30213305 |
| RASSF2      | 0.323977729 |  | SP3      | 0.30211538 |
| NCF1C       | 0.323661897 |  | SFI1     | 0.3021018  |
| FCGR2A      | 0.323463935 |  | CRYZ     | 0.30208222 |
| GIMAP6      | 0.32338261  |  | RHPN2    | 0.30206795 |
| GMFG        | 0.323320513 |  | NMNAT3   | 0.30202844 |
| PSTPIP1     | 0.323253895 |  | RAI14    | 0.30202513 |



|           |             |  |          |            |
|-----------|-------------|--|----------|------------|
| FAM78A    | 0.323192425 |  | PTBP1    | 0.30201982 |
| TRAF1     | 0.323183055 |  | PDLIM5   | 0.30201237 |
| OPTN      | 0.323154141 |  | POLDIP3  | 0.30192907 |
| HAVCR2    | 0.323002352 |  | ILDR1    | 0.30190414 |
| TLR6      | 0.322683525 |  | ERN1     | 0.30186801 |
| UBASH3B   | 0.32263836  |  | HEATR1   | 0.30184776 |
| MYO1G     | 0.322564273 |  | AGBL5    | 0.30184351 |
| TNFAIP8L2 | 0.322443371 |  | ARSD     | 0.30172685 |
| CHST2     | 0.322427186 |  | HNRNPU   | 0.30166651 |
| MYO5A     | 0.322392769 |  | FAM129B  | 0.30162326 |
| SIRPB1    | 0.32237897  |  | EPB41    | 0.30159408 |
| THEMIS    | 0.322091821 |  | ZNF317   | 0.30158835 |
| DSE       | 0.32159631  |  | SHROOM3  | 0.30158786 |
| HCST      | 0.321571689 |  | NDE1     | 0.30158665 |
| PYHIN1    | 0.321447675 |  | CASP2    | 0.30158539 |
| GNG2      | 0.32134957  |  | REPS1    | 0.30153321 |
| MARCH1    | 0.321306739 |  | GPR89A   | 0.30152674 |
| CORO1A    | 0.321140438 |  | MORC2    | 0.30152571 |
| BTK       | 0.320970912 |  | SND1     | 0.30145013 |
| IL32      | 0.320703336 |  | PIGN     | 0.30139014 |
| AOAH      | 0.320634821 |  | MLLT4    | 0.30136548 |
| LAMP3     | 0.320542771 |  | ZCCHC17  | 0.3013573  |
| CDKL1     | 0.320432105 |  | EXOSC10  | 0.30133504 |
| PHACTR1   | 0.320413918 |  | CELF1    | 0.30133493 |
| PARP15    | 0.320317042 |  | FAM102B  | 0.30131338 |
| PTPN6     | 0.320169482 |  | SRSF11   | 0.30130714 |
| LIPG      | 0.320134528 |  | KIAA0528 | 0.30122954 |
| LAPTM5    | 0.320105723 |  | DDR1     | 0.30122722 |
| NCF2      | 0.319922471 |  | DDAH1    | 0.30116961 |
| CECR1     | 0.319570397 |  | CD59     | 0.30115261 |
| ZC3H12D   | 0.319392014 |  | FAM83H   | 0.30114991 |
| RNASE6    | 0.319379424 |  | FARP1    | 0.301138   |
| FAM20C    | 0.319257312 |  | ERLEC1   | 0.30110231 |
| CASP1     | 0.319256078 |  | EML2     | 0.30106996 |
| SERPING1  | 0.31916463  |  | NAV2     | 0.30102697 |
| STAT5A    | 0.319071547 |  | ZMYND11  | 0.30102282 |
| HLA-E     | 0.319010782 |  | PAK1     | 0.30100345 |
| PML       | 0.318954051 |  | LRP2     | 0.30100021 |
| RGS18     | 0.318912196 |  | ZC3H7B   | 0.30097942 |
| LRRFIP2   | 0.318830205 |  | HPS4     | 0.30096668 |
| SPOCK2    | 0.318758908 |  | HNRNPK   | 0.30090882 |
| GBP1      | 0.318677835 |  | PUM1     | 0.3009088  |

|           |             |  |           |            |
|-----------|-------------|--|-----------|------------|
| CD84      | 0.318641348 |  | CYP51A1   | 0.30088139 |
| SLC2A5    | 0.318508443 |  | AMFR      | 0.30087974 |
| MCFD2     | 0.318414935 |  | BNIP1     | 0.30087322 |
| GFI1      | 0.318387274 |  | OSBPL1A   | 0.30085993 |
| ITK       | 0.318374188 |  | GRHL1     | 0.30085988 |
| SBNO2     | 0.318363822 |  | KCTD3     | 0.30084376 |
| IL17RA    | 0.318032615 |  | LYPD6     | 0.30084187 |
| IL2RB     | 0.317895714 |  | DLG3      | 0.3008407  |
| TRPV2     | 0.317739366 |  | NUP133    | 0.3008185  |
| CD8A      | 0.317714557 |  | FBXO7     | 0.30073647 |
| C1QB      | 0.317691501 |  | DUSP16    | 0.30072969 |
| SIGLEC14  | 0.317276046 |  | ZFAND4    | 0.30071698 |
| SERPINB9  | 0.317126427 |  | EIF4ENIF1 | 0.30065438 |
| SLC8A1    | 0.317105819 |  | FAM134A   | 0.30065423 |
| SLA2      | 0.317104164 |  | GLI3      | 0.30064457 |
| GBP4      | 0.316940757 |  | GTPBP1    | 0.30062736 |
| TUBB6     | 0.316896169 |  | PAPSS1    | 0.30061427 |
| CD83      | 0.3167353   |  | DTNB      | 0.30060428 |
| FPR3      | 0.316628328 |  | SPTAN1    | 0.30059429 |
| PIK3CD    | 0.316572444 |  | ASH1L     | 0.30057161 |
| C1QA      | 0.316515897 |  | EP300     | 0.30056901 |
| CLIP2     | 0.316463518 |  | PARN      | 0.30055252 |
| CTSZ      | 0.316422632 |  | MACF1     | 0.30054571 |
| TLR10     | 0.316307058 |  | DNMT1     | 0.30047271 |
| SIT1      | 0.316013028 |  | RABL2B    | 0.30047168 |
| FCER1G    | 0.316007767 |  | KDSR      | 0.30045023 |
| VNN2      | 0.316005984 |  | SPECC1L   | 0.30041107 |
| SIPA1     | 0.315994603 |  | MFSD6     | 0.30040383 |
| TMEM150B  | 0.315939328 |  | SPINT1    | 0.30039395 |
| S1PR4     | 0.315937551 |  | ARHGEF12  | 0.30038652 |
| GIMAP4    | 0.315932838 |  | PTPN9     | 0.30038153 |
| FMNL1     | 0.315873263 |  | ATXN7L3   | 0.30037419 |
| PLA2G2D   | 0.315778905 |  | FAM198A   | 0.30035186 |
| SIGLEC7   | 0.315493144 |  | GPBP1L1   | 0.30032496 |
| IL18R1    | 0.315490095 |  | LAMC2     | 0.30031426 |
| CIITA     | 0.315457021 |  | PCNXL2    | 0.30029702 |
| NECAP2    | 0.315450412 |  | CLUL1     | 0.30029531 |
| C10orf128 | 0.31539804  |  | KIAA1191  | 0.30028818 |
| MPP1      | 0.315358983 |  | DGCR2     | 0.30027758 |
| RNF19B    | 0.315333601 |  | PSD4      | 0.30027118 |
| IL16      | 0.31529818  |  | MAGI3     | 0.30026278 |
| GIMAP7    | 0.315258043 |  | PIK3CB    | 0.30025572 |

|          |             |  |          |             |
|----------|-------------|--|----------|-------------|
| OSBPL3   | 0.315141542 |  | INTS7    | 0.30024542  |
| TIGIT    | 0.315009926 |  | MFSD1    | 0.30020537  |
| PPP1R16B | 0.314931933 |  | MICALL1  | 0.30013156  |
| CD300C   | 0.314864577 |  | PION     | 0.30012843  |
| FAM65B   | 0.31476444  |  | DHX34    | 0.30011905  |
| IRF8     | 0.314642035 |  | FLNB     | 0.3001068   |
| LCP2     | 0.314591637 |  | TLK1     | 0.30009122  |
| BCL2A1   | 0.314527373 |  | PUS7     | 0.30007213  |
| CR1      | 0.314467276 |  | COG2     | 0.30003053  |
| SLC7A7   | 0.314383927 |  | MARCH8   | 0.30001073  |
| RCSD1    | 0.314333478 |  | RNF2     | 0.3000106   |
| CSDA     | 0.314254776 |  | PRPS2    | 0.30000608  |
| SH2D2A   | 0.314209919 |  | PDE1B    | -0.30000886 |
| ABI3     | 0.31412582  |  | ECHS1    | -0.30605585 |
| CCDC50   | 0.31394181  |  | FTL      | -0.30612301 |
| RNF145   | 0.313872942 |  | SLC2A4RG | -0.30719697 |
| CORO1C   | 0.313849342 |  | FAM96B   | -0.30749696 |
| SPI1     | 0.31382622  |  | SLC9A3R2 | -0.31081107 |
| CTSC     | 0.313757056 |  | FHOD1    | -0.31383827 |
| CCL5     | 0.313755389 |  | TM7SF2   | -0.32011637 |
| CLIC2    | 0.313677586 |  | PFKFB1   | -0.32717401 |
| WDFY4    | 0.313552766 |  | VAMP5    | -0.33155483 |
| CEP85L   | 0.313500696 |  | AGPAT2   | -0.33228669 |
| S1PR2    | 0.313397803 |  | ACOT8    | -0.33926703 |
| SIGLEC9  | 0.313160787 |  | VEGFB    | -0.34921597 |
| UPP1     | 0.313113599 |  |          |             |
| ELAC1    | 0.313062369 |  |          |             |
| JAK3     | 0.313005606 |  |          |             |
| PLCL2    | 0.312977106 |  |          |             |
| LGALS2   | 0.312966938 |  |          |             |
| RELB     | 0.312867615 |  |          |             |
| CCL18    | 0.312841483 |  |          |             |
| NAIP     | 0.312439729 |  |          |             |
| PDE6G    | 0.312415801 |  |          |             |
| MIR155HG | 0.312379103 |  |          |             |
| GRK5     | 0.312250164 |  |          |             |
| HABP4    | 0.312226922 |  |          |             |
| DENND1C  | 0.312195083 |  |          |             |
| PPM1F    | 0.31218835  |  |          |             |
| GBP5     | 0.312184585 |  |          |             |
| TOX      | 0.312111842 |  |          |             |
| LST1     | 0.312101408 |  |          |             |

|          |             |
|----------|-------------|
| HAS2     | 0.312062962 |
| TTC7A    | 0.311928934 |
| CD72     | 0.31189729  |
| AIM2     | 0.311867893 |
| TM6SF1   | 0.311834494 |
| CD209    | 0.311762893 |
| LHFPL2   | 0.311578925 |
| ARRB2    | 0.311533771 |
| XCL2     | 0.311520462 |
| TRIM22   | 0.311455827 |
| CTLA4    | 0.311399753 |
| C1orf162 | 0.311370574 |
| RASAL3   | 0.311339992 |
| ETV5     | 0.31126299  |
| FAIM3    | 0.311258446 |
| MRC1     | 0.311224925 |
| NCOA7    | 0.311133111 |
| GZMH     | 0.311124691 |
| IL12RB1  | 0.310826693 |
| FASLG    | 0.310724281 |
| BTN3A1   | 0.310696175 |
| KLRB1    | 0.310685743 |
| CARD11   | 0.310553763 |
| C1QC     | 0.31047685  |
| TFEB     | 0.310382347 |
| PLAGL1   | 0.310352435 |
| ST8SIA4  | 0.310281018 |
| HLA-DRB1 | 0.31021079  |
| KLRG1    | 0.310160645 |
| CCR1     | 0.310144025 |
| RASGRP4  | 0.310071473 |
| LY9      | 0.310067113 |
| C1S      | 0.310027992 |
| STAT4    | 0.309780933 |
| DPEP2    | 0.309726471 |
| P2RY8    | 0.309702126 |
| MGAT1    | 0.309690495 |
| CD2      | 0.309663374 |
| SYK      | 0.309630976 |
| GFPT2    | 0.309611301 |
| GBGT1    | 0.309606468 |
| SH2D3C   | 0.309580324 |

|             |             |
|-------------|-------------|
| RASGRP2     | 0.309463201 |
| LILRA5      | 0.30940264  |
| P2RX7       | 0.309332545 |
| DENND3      | 0.309301724 |
| GNA15       | 0.309298522 |
| MOB3B       | 0.309297969 |
| TLR1        | 0.30901096  |
| CD27        | 0.308816053 |
| TESPA1      | 0.308706768 |
| CD3D        | 0.308669471 |
| COTL1       | 0.308553008 |
| RPS6KA3     | 0.308550488 |
| UBASH3A     | 0.308544295 |
| SEPT1       | 0.308479855 |
| EMILIN2     | 0.308432864 |
| PLCG2       | 0.308310394 |
| CD79B       | 0.308295922 |
| PRDM8       | 0.308127205 |
| RASA3       | 0.308106203 |
| CD1C        | 0.308070046 |
| RAP1A       | 0.308057415 |
| CTSB        | 0.308028564 |
| HK3         | 0.307999632 |
| CLEC12A     | 0.307951304 |
| CD37        | 0.307894189 |
| KLRC4-KLRK1 | 0.307848286 |
| ADAM28      | 0.307828509 |
| IL2RG       | 0.307804204 |
| FAM126A     | 0.307728255 |
| LAT2        | 0.307724978 |
| PTGS1       | 0.307716608 |
| PTGDS       | 0.307716288 |
| TFEC        | 0.307404012 |
| FAS         | 0.307329394 |
| C13orf33    | 0.307263636 |
| PILRA       | 0.307253103 |
| POU2F2      | 0.307132962 |
| LOC10013289 | 0.307095356 |
| TNFSF13B    | 0.307044398 |
| ACAP1       | 0.307034267 |
| C8orf80     | 0.307030432 |
| TRAT1       | 0.306977495 |

|          |             |
|----------|-------------|
| GGTA1P   | 0.30692788  |
| BST1     | 0.306927801 |
| LCP1     | 0.306916426 |
| HLA-DQA2 | 0.30690636  |
| QKI      | 0.306901073 |
| RAC2     | 0.306829626 |
| CD40LG   | 0.30682567  |
| CLEC2B   | 0.30675117  |
| STK17A   | 0.306648546 |
| IL6R     | 0.306565024 |
| CD38     | 0.30654611  |
| PLEKHO1  | 0.306543921 |
| RGL1     | 0.306528734 |
| LSP1     | 0.306400325 |
| PARVG    | 0.306372044 |
| EBI3     | 0.306329603 |
| SLC2A3   | 0.306310022 |
| FCRL6    | 0.306269823 |
| FAM171A1 | 0.306248447 |
| AAED1    | 0.306208668 |
| PRKCB    | 0.306177513 |
| PTPN22   | 0.306076017 |
| SIRPG    | 0.305901063 |
| MRAS     | 0.305899201 |
| APOBEC3G | 0.305844941 |
| BIRC3    | 0.305841955 |
| ENO1     | 0.305808719 |
| GZMA     | 0.305776336 |
| CMTM7    | 0.30576387  |
| ITGAX    | 0.305758112 |
| PRKCA    | 0.305669402 |
| RAB27A   | 0.305667235 |
| CPNE8    | 0.305651269 |
| FCRLA    | 0.305521983 |
| PLAC8    | 0.305518445 |
| PIM1     | 0.305461899 |
| LY96     | 0.305448185 |
| PDCD1    | 0.305411676 |
| AKR1B1   | 0.305382779 |
| PTPRE    | 0.305370085 |
| IPCEF1   | 0.305361333 |
| FCGR2C   | 0.30532901  |

|          |             |
|----------|-------------|
| RASSF5   | 0.305272896 |
| TLN1     | 0.305258393 |
| ARHGAP15 | 0.305242745 |
| ACSL5    | 0.305220183 |
| C3       | 0.305213349 |
| VAV1     | 0.305211053 |
| GPR84    | 0.305161483 |
| ADAMDEC1 | 0.305065118 |
| KIFC3    | 0.305042039 |
| MICALL1  | 0.304978999 |
| DOCK4    | 0.304930579 |
| NPL      | 0.304925509 |
| ZBED2    | 0.304917674 |
| MYO1F    | 0.304885651 |
| CHST3    | 0.304794612 |
| CXCL16   | 0.30473206  |
| HSD11B1  | 0.304710398 |
| ARHGAP31 | 0.304703386 |
| GTDC1    | 0.304694839 |
| FLJ27354 | 0.304623725 |
| DUSP7    | 0.304494941 |
| NCR3     | 0.304467508 |
| EMR2     | 0.304421776 |
| C2       | 0.304421694 |
| CCDC71L  | 0.304417087 |
| RAB8B    | 0.304404549 |
| VCAM1    | 0.304357887 |
| PLEKHG1  | 0.304289073 |
| SPSB1    | 0.30423604  |
| BANK1    | 0.304165693 |
| CCL2     | 0.30415535  |
| CCR4     | 0.30409605  |
| ADCY3    | 0.304068611 |
| CPXM2    | 0.304005158 |
| NLRC4    | 0.303962547 |
| STAP1    | 0.303958367 |
| IL4I1    | 0.303928375 |
| MEI1     | 0.303889206 |
| PRKX     | 0.303749287 |
| SRGAP2   | 0.303743322 |
| CHI3L1   | 0.303716725 |
| IGSF6    | 0.303716638 |

|          |             |
|----------|-------------|
| HLA-DQB1 | 0.303708036 |
| RND3     | 0.30369298  |
| APOL6    | 0.30368597  |
| TCP11L1  | 0.303677166 |
| ITGAM    | 0.303650377 |
| PDPN     | 0.303619781 |
| UNC13D   | 0.303612764 |
| CD3E     | 0.303559661 |
| MYO7A    | 0.303527085 |
| APBB1IP  | 0.303527075 |
| PNRC1    | 0.303508532 |
| IL15     | 0.303506983 |
| SYNE1    | 0.303504461 |
| GIMAP8   | 0.303501088 |
| GYPE     | 0.303425273 |
| MKL1     | 0.303400629 |
| SAMD4A   | 0.303390376 |
| SH2B3    | 0.303317221 |
| GBP2     | 0.303309857 |
| IGF2BP2  | 0.303285222 |
| CCDC88A  | 0.303255854 |
| FOLR2    | 0.303238832 |
| ARPC2    | 0.303236014 |
| GPR114   | 0.303170777 |
| CCL4     | 0.303161104 |
| NLRP3    | 0.303121191 |
| EPB41L3  | 0.303111115 |
| FMNL2    | 0.303073498 |
| MAP4K1   | 0.3030681   |
| HLA-DPA1 | 0.303067964 |
| C11orf75 | 0.303045131 |
| NFE2L3   | 0.303042014 |
| MLKL     | 0.303029407 |
| SELL     | 0.303011607 |
| DFNA5    | 0.302922692 |
| CD5      | 0.302886469 |
| MFHAS1   | 0.302869699 |
| PRDM1    | 0.302863122 |
| TRIP10   | 0.302789885 |
| LILRB5   | 0.302750963 |
| IFNGR1   | 0.302734446 |
| POU2AF1  | 0.302699683 |



|          |             |
|----------|-------------|
| FAT1     | 0.302696343 |
| RBMS1    | 0.302686026 |
| LILRA6   | 0.302681986 |
| HLA-DRB6 | 0.30264657  |
| CYTH1    | 0.302575766 |
| PLA2G4A  | 0.302539861 |
| NLRC3    | 0.302511821 |
| GIT2     | 0.302501647 |
| STAMBPL1 | 0.302425761 |
| FYN      | 0.30240008  |
| ITM2C    | 0.302335933 |
| FCRL5    | 0.302306964 |
| FAM26F   | 0.302260278 |
| FRMD4A   | 0.302250393 |
| MYO9B    | 0.302238831 |
| IL27RA   | 0.302238763 |
| PLIN2    | 0.30221633  |
| PSAP     | 0.302204945 |
| MOXD1    | 0.302165776 |
| MCOLN2   | 0.302158509 |
| TMEM140  | 0.302127767 |
| ADPRH    | 0.302119269 |
| GPR171   | 0.302118566 |
| RAB32    | 0.30208832  |
| IL1RAP   | 0.302020355 |
| ICOS     | 0.302002163 |
| TOX2     | 0.301959506 |
| PPARA    | 0.301957871 |
| TRPM2    | 0.301942334 |
| CD6      | 0.301899538 |
| LCK      | 0.301890472 |
| CHI3L2   | 0.301878432 |
| TGFBR2   | 0.301801388 |
| STK10    | 0.301786068 |
| OSMR     | 0.301773102 |
| MALL     | 0.301755457 |
| HLA-DOB  | 0.301712744 |
| WARS     | 0.301671219 |
| CD300LF  | 0.301599718 |
| CFP      | 0.301595981 |
| IDO1     | 0.301595326 |
| P2RX1    | 0.301578372 |

|          |             |
|----------|-------------|
| SEL1L3   | 0.301552126 |
| BTN3A3   | 0.301539705 |
| PLA2G7   | 0.30153958  |
| RABGAP1L | 0.301509501 |
| C14orf49 | 0.301509175 |
| SP140    | 0.301488613 |
| TLE4     | 0.301483476 |
| CLMP     | 0.301480455 |
| PLS3     | 0.301434449 |
| GNGT2    | 0.301400537 |
| C1QTNF1  | 0.301357817 |
| RAPGEF1  | 0.301318466 |
| CCDC109B | 0.301264737 |
| LGMN     | 0.301227697 |
| MAP7D3   | 0.301222891 |
| NT5E     | 0.301214481 |
| DPP4     | 0.301204492 |
| PLEKHM2  | 0.301156748 |
| SUN2     | 0.30114281  |
| MARCO    | 0.301139808 |
| ANXA1    | 0.301136913 |
| MYO1E    | 0.301132419 |
| FMNL3    | 0.30112247  |
| ITGB7    | 0.301112471 |
| KLRK1    | 0.30109928  |
| NFATC1   | 0.301094143 |
| ARHGAP22 | 0.301024767 |
| TIMP2    | 0.301021124 |
| PLD1     | 0.301019518 |
| SLC9B2   | 0.301018007 |
| SLFN11   | 0.301005579 |
| TRIB2    | 0.300985829 |
| ANTXR2   | 0.300983552 |
| RFTN1    | 0.30096947  |
| PLCB2    | 0.300913836 |
| PTPRO    | 0.300890022 |
| HMHA1    | 0.300877511 |
| PARVB    | 0.300872073 |
| NRP2     | 0.300859694 |
| DOCK8    | 0.300843769 |
| ARHGAP9  | 0.300839095 |
| TSPAN4   | 0.300813966 |

|          |             |
|----------|-------------|
| DZIP1    | 0.300806968 |
| TRAF3IP3 | 0.300794648 |
| RARRES1  | 0.30074584  |
| NLRC5    | 0.300739881 |
| CFLAR    | 0.300732558 |
| EPB41L2  | 0.300719986 |
| PRR5L    | 0.300716921 |
| SAMD3    | 0.300678831 |
| ITGA4    | 0.300675531 |
| LPCAT2   | 0.300672483 |
| SGTB     | 0.300660092 |
| SLC43A3  | 0.30062906  |
| AXL      | 0.300622036 |
| NMT2     | 0.300596725 |
| HLA-DMA  | 0.300577967 |
| LTA      | 0.30056357  |
| SKAP2    | 0.300561078 |
| MAN2B1   | 0.300554249 |
| PLTP     | 0.300539076 |
| FSCN1    | 0.300497954 |
| REXO2    | 0.300487861 |
| TCF7     | 0.300486576 |
| CREM     | 0.300473636 |
| ZEB2     | 0.300472913 |
| CD48     | 0.300465515 |
| CLEC7A   | 0.300460392 |
| CCDC88B  | 0.300451901 |
| PRKCQ    | 0.300447747 |
| RNF166   | 0.300419618 |
| SLC18B1  | 0.300404055 |
| TYROBP   | 0.30037665  |
| CTSW     | 0.300358648 |
| CXCL1    | 0.300346621 |
| TMC8     | 0.300329236 |
| GLS      | 0.300293425 |
| FLNA     | 0.300288346 |
| MTHFD1L  | 0.300275319 |
| MFI2     | 0.300275133 |
| ALOX5    | 0.300274703 |
| TGFBI    | 0.300251436 |
| KIAA1274 | 0.300251141 |
| MCTP1    | 0.30023006  |

|            |             |
|------------|-------------|
| ARHGEF6    | 0.300222378 |
| SCIMP      | 0.300219943 |
| ITGAE      | 0.300203023 |
| ALDH1A3    | 0.300200044 |
| ARNTL2     | 0.300183827 |
| IFFO1      | 0.300179479 |
| NLRP1      | 0.300157996 |
| PAG1       | 0.300142068 |
| LRRK1      | 0.300103702 |
| PELI1      | 0.300093048 |
| APOL3      | 0.300055879 |
| BTLA       | 0.30005501  |
| ST3GAL2    | 0.300051916 |
| PTGIS      | 0.300036927 |
| DOCK11     | 0.300034551 |
| LY75-CD302 | 0.300032131 |
| RASGEF1B   | 0.300010915 |
| AP1G2      | -0.30006238 |
| LINC       | -0.30016384 |
| PPDPF      | -0.30020125 |
| FKBP3      | -0.30023809 |
| C17orf28   | -0.30038029 |
| CNTD2      | -0.30045538 |
| ATP8B1     | -0.30048305 |
| MIPEP      | -0.30053746 |
| TTC8       | -0.30062884 |
| SLC9A3R2   | -0.30074262 |
| ERGIC1     | -0.30078056 |
| LMX1B      | -0.30092303 |
| PVRL2      | -0.30095829 |
| BIK        | -0.30115036 |
| KRT8       | -0.30132504 |
| TRIM3      | -0.30174575 |
| UBE3B      | -0.3019779  |
| DOLPP1     | -0.302089   |
| ATP5G2     | -0.3021019  |
| GOLGA5     | -0.30249519 |
| KLHDC9     | -0.30256621 |
| PIGM       | -0.30259436 |
| SOGA1      | -0.30260999 |
| TMEM57     | -0.30301737 |
| JKAMP      | -0.3032048  |

|             |             |
|-------------|-------------|
| ABCC5       | -0.30337005 |
| C1orf9      | -0.30359706 |
| EXD2        | -0.30439136 |
| STRBP       | -0.30439472 |
| USP7        | -0.30480366 |
| TRPT1       | -0.30482328 |
| MRPS36      | -0.30492286 |
| PRR15L      | -0.30507995 |
| CCDC125     | -0.30614705 |
| CCDC87      | -0.30615276 |
| EPN3        | -0.30668917 |
| STARD10     | -0.30740325 |
| MTA3        | -0.30772829 |
| TSPAN13     | -0.30800447 |
| LOC145837   | -0.3089374  |
| FKBP4       | -0.30946357 |
| GFM2        | -0.31028292 |
| MCF2L       | -0.31082892 |
| INO80B-WBP  | -0.31090664 |
| YTHDF1      | -0.3112922  |
| TMEM141     | -0.31167567 |
| LRBA        | -0.31285363 |
| SUOX        | -0.31302181 |
| CRNKL1      | -0.31371308 |
| RUSC1       | -0.3156202  |
| LOC10086140 | -0.31564182 |
| ATP6V1G1    | -0.31692588 |
| ARID2       | -0.31697985 |
| SYNJ2BP-CO  | -0.31753248 |
| DNAJC14     | -0.31753594 |
| PPP1R10     | -0.31845861 |
| ZDHHC16     | -0.31870133 |
| CTPS2       | -0.3213293  |
| SLC22A5     | -0.32287848 |
| ERBB3       | -0.32445907 |
| C19orf46    | -0.32648274 |
| ESRP2       | -0.32806701 |
| COQ6        | -0.32814499 |
| KIAA0182    | -0.3326765  |
| NFS1        | -0.33496386 |
| PDXDC1      | -0.33814039 |
| LOC93622    | -0.33912921 |

|         |             |
|---------|-------------|
| MNAT1   | -0.34054054 |
| IRX5    | -0.34054253 |
| COPZ1   | -0.34095202 |
| VPS52   | -0.34200704 |
| SEC16A  | -0.34474532 |
| SLC19A2 | -0.34727781 |
| CREB3L4 | -0.35176073 |
| SMUG1   | -0.37507384 |
| NECAB3  | -0.38016844 |
